# Supplementary material
Source: Research Square preprint supplement (doi:10.21203/rs.3.rs-10300113/v1)
Supplement: Supplementary file 1 [file 24a35c8b2e6bdf54eb5ea316.docx]

**Supplementary Table 2. Urine-output data quality and AKI-definition concordance**

**A. Urine-output observability and sparse-record audit**

| **Database** | **First eligible stays, n** | **Full KDIGO analyzable, n** | **Primary Scr-AKI cohort, n** | **Urine output observable, n (%)** | **Urine-output AKI, n** | **Urine-output-only AKI, n** | **Sparse-record QC** |
| --- | --- | --- | --- | --- | --- | --- | --- |
| MIMIC-IV | 472 | 455 | 387 | 360 (93.0%) | 140 | 104 |  |
| eICU | 606 | 530 | 325 | 213 (65.5%) | 90 | 75 | 14 sparse-only 6-h windows; 87 with max gap >6 h; median max gap 360 min |

Note. Panel A audits why serum creatinine AKI was used as the primary exposure. The raw urine-output flag is broad; sparse-record fields identify eICU urine-output AKI events potentially driven by isolated 6-hour windows or long measurement gaps.

**B. Concordance between serum creatinine AKI and full KDIGO AKI**

| **Stratum** | **Subset** | **N** | **Scr-AKI, n** | **Full KDIGO AKI, n** | **Scr-only, n** | **Full-only, n** | **Scr-AKI among full KDIGO AKI** | **Full-only among full KDIGO AKI** | **Both negative, n** |
| --- | --- | --- | --- | --- | --- | --- | --- | --- | --- |
| Pooled | All main analyzable | 712 | 121 | 304 | 0 | 183 | 121/304 (39.8%) | 183/304 (60.2%) | 408 |
| Pooled | Urine output observable | 573 | 94 | 274 | 0 | 180 | 94/274 (34.3%) | 180/274 (65.7%) | 299 |
| MIMIC-IV | All main analyzable | 387 | 64 | 170 | 0 | 106 | 64/170 (37.6%) | 106/170 (62.4%) | 217 |
| MIMIC-IV | Urine output observable | 360 | 59 | 164 | 0 | 105 | 59/164 (36.0%) | 105/164 (64.0%) | 196 |
| eICU | All main analyzable | 325 | 57 | 134 | 0 | 77 | 57/134 (42.5%) | 77/134 (57.5%) | 191 |
| eICU | Urine output observable | 213 | 35 | 110 | 0 | 75 | 35/110 (31.8%) | 75/110 (68.2%) | 103 |

Note. Full KDIGO AKI includes serum creatinine, urine-output, or timed RRT criteria. Serum creatinine AKI was nested within full KDIGO AKI in these extracts; therefore Scr-only counts were zero. Because this is a subset relationship rather than two independent parallel classifications, Cohen kappa was not reported.
