# Supplementary material
Source: Research Square preprint supplement (doi:10.21203/rs.3.rs-10300113/v1)
Supplement: Supplementary file 2 [file 37daf7794c8932652b520acf.docx]

**Supplementary Table 3. Maternal outcome components by serum creatinine AKI status**

| **Stratum** | **Outcome component** | **N** | **No Scr-AKI group, n** | **No Scr-AKI events, n (%)** | **Scr-AKI group, n** | **Scr-AKI events, n (%)** | **Risk difference** | **P value** |
| --- | --- | --- | --- | --- | --- | --- | --- | --- |
| Pooled | Composite outcome excluding RRT | 712 | 591 | 290 (49.1%) | 121 | 91 (75.2%) | 26.1 pp | <0.001 |
| Pooled | Invasive mechanical ventilation | 712 | 591 | 184 (31.1%) | 121 | 64 (52.9%) | 21.8 pp | <0.001 |
| Pooled | Prolonged ICU LOS | 712 | 591 | 166 (28.1%) | 121 | 62 (51.2%) | 23.2 pp | <0.001 |
| Pooled | Vasopressor use | 712 | 591 | 70 (11.8%) | 121 | 28 (23.1%) | 11.3 pp | 0.002 |
| Pooled | Hospital mortality | 712 | 591 | 3 (0.5%) | 121 | 3 (2.5%) | 2.0 pp | 0.065 |
| Pooled | ICU mortality | 712 | 591 | 2 (0.3%) | 121 | 3 (2.5%) | 2.1 pp | 0.037 |
| Pooled | RRT use (descriptive; not in composite) | 712 | 591 | 10 (1.7%) | 121 | 8 (6.6%) | 4.9 pp | 0.005 |
| MIMIC-IV | Composite outcome excluding RRT | 387 | 323 | 157 (48.6%) | 64 | 51 (79.7%) | 31.1 pp | <0.001 |
| MIMIC-IV | Invasive mechanical ventilation | 387 | 323 | 119 (36.8%) | 64 | 42 (65.6%) | 28.8 pp | <0.001 |
| MIMIC-IV | Prolonged ICU LOS | 387 | 323 | 73 (22.6%) | 64 | 31 (48.4%) | 25.8 pp | <0.001 |
| MIMIC-IV | Vasopressor use | 387 | 323 | 35 (10.8%) | 64 | 14 (21.9%) | 11.0 pp | 0.022 |
| MIMIC-IV | Hospital mortality | 387 | 323 | 3 (0.9%) | 64 | 2 (3.1%) | 2.2 pp | 0.193 |
| MIMIC-IV | ICU mortality | 387 | 323 | 2 (0.6%) | 64 | 2 (3.1%) | 2.5 pp | 0.129 |
| MIMIC-IV | RRT use (descriptive; not in composite) | 387 | 323 | 8 (2.5%) | 64 | 7 (10.9%) | 8.5 pp | 0.005 |
| eICU | Composite outcome excluding RRT | 325 | 268 | 133 (49.6%) | 57 | 40 (70.2%) | 20.5 pp | 0.005 |
| eICU | Invasive mechanical ventilation | 325 | 268 | 65 (24.3%) | 57 | 22 (38.6%) | 14.3 pp | 0.032 |
| eICU | Prolonged ICU LOS | 325 | 268 | 93 (34.7%) | 57 | 31 (54.4%) | 19.7 pp | 0.007 |
| eICU | Vasopressor use | 325 | 268 | 35 (13.1%) | 57 | 14 (24.6%) | 11.5 pp | 0.040 |
| eICU | Hospital mortality | 325 | 268 | 0 (0.0%) | 57 | 1 (1.8%) | 1.8 pp | 0.175 |
| eICU | ICU mortality | 325 | 268 | 0 (0.0%) | 57 | 1 (1.8%) | 1.8 pp | 0.175 |
| eICU | RRT use (descriptive; not in composite) | 325 | 268 | 2 (0.7%) | 57 | 1 (1.8%) | 1.0 pp | 0.440 |

Note. P values are unadjusted comparisons for descriptive component profiles. RRT is shown for clinical description only and was excluded from the composite adverse maternal outcome.
