# Supplementary material
Source: Research Square preprint supplement (doi:10.21203/rs.3.rs-10300113/v1)
Supplement: Supplementary file 3 [file bee51aa46f90050b52b7bbc4.docx]

**Supplementary Table 4. Effect-scale sensitivity analyses**

| **Measure** | **Stratum** | **N** | **Events** | **Scr-AKI events/N** | **No Scr-AKI events/N** | **Estimate (95% CI)** | **P value** | **Adjusted risk, No Scr-AKI** | **Adjusted risk, Scr-AKI** |
| --- | --- | --- | --- | --- | --- | --- | --- | --- | --- |
| Adjusted RR | Pooled | 712 | 381 | 91/121 | 290/591 | 1.56 (1.37-1.79) | <0.001 |  |  |
| Adjusted RR | MIMIC-IV | 387 | 208 | 51/64 | 157/323 | 1.66 (1.39-1.97) | <0.001 |  |  |
| Adjusted RR | eICU | 325 | 173 | 40/57 | 133/268 | 1.48 (1.20-1.82) | <0.001 |  |  |
| Adjusted RD, percentage points | Pooled | 712 | 381 | 91/121 | 290/591 | 27.1 (18.5-35.5) | <0.001 | 48.9% | 76.0% |
| Adjusted RD, percentage points | MIMIC-IV | 387 | 208 | 51/64 | 157/323 | 31.6 (20.9-43.7) | <0.001 | 48.5% | 80.1% |
| Adjusted RD, percentage points | eICU | 325 | 173 | 40/57 | 133/268 | 22.6 (7.7-35.2) | 0.006 | 49.2% | 71.8% |

Note. Adjusted RRs were estimated using modified Poisson regression with robust standard errors. Adjusted RDs were estimated using logistic marginal standardization with bootstrap confidence intervals. Pooled models included the primary covariates plus database fixed effect; database-stratified models used the primary covariates without database fixed effect.
