# Supplementary material
Source: Research Square preprint supplement (doi:10.21203/rs.3.rs-10300113/v1)
Supplement: Supplementary file 4 [file bf9bc1fd415eff10ef29d7ba.docx]

**Supplementary Table 1. Model specification, database consistency, and sensitivity analyses**

| **Analysis** | **Stratum** | **Estimand/outcome** | **N** | **Events** | **Exposed n (%)** | **Events among exposed** | **OR (95% CI)** | **P value** | **Notes** |
| --- | --- | --- | --- | --- | --- | --- | --- | --- | --- |
| **A. Model specification** | | | | | | | | | |
| Crude | Pooled | OR for serum creatinine AKI | 712 | 381 | 121 (17.0%) | 91 | 3.15 (2.02-4.91) | <0.001 | MICE framework; no database fixed effect |
| Age + race | Pooled | OR for serum creatinine AKI | 712 | 381 | 121 (17.0%) | 91 | 3.13 (2.01-4.89) | <0.001 | MICE framework; no database fixed effect |
| Age + race + baseline creatinine | Pooled | OR for serum creatinine AKI | 712 | 381 | 121 (17.0%) | 91 | 3.14 (2.01-4.90) | <0.001 | MICE framework; no database fixed effect |
| Age + race + baseline creatinine + chronic hypertension + diabetes | Pooled | OR for serum creatinine AKI | 712 | 381 | 121 (17.0%) | 91 | 3.37 (2.14-5.30) | <0.001 | MICE framework; no database fixed effect |
| Database-adjusted | Pooled | OR for serum creatinine AKI | 712 | 381 | 121 (17.0%) | 91 | 3.15 (2.02-4.91) | <0.001 | Observed complete data; database fixed effect only |
| Primary model with database fixed effect | Pooled | OR for serum creatinine AKI | 712 | 381 | 121 (17.0%) | 91 | 3.36 (2.14-5.29) | <0.001 | MICE framework; prespecified primary model |
| Complete-case primary model | Pooled | OR for serum creatinine AKI | 712 | 381 | 121 (17.0%) | 91 | 3.36 (2.14-5.29) | <0.001 | Observed complete data; no model-variable missingness |
| **B. Database consistency** | | | | | | | | | |
| Database-stratified primary model | MIMIC-IV | OR for serum creatinine AKI | 387 | 208 | 64 (16.5%) | 51 | 4.45 (2.28-8.68) | <0.001 | MICE framework; database fixed effect omitted |
| Database-stratified primary model | eICU | OR for serum creatinine AKI | 325 | 173 | 57 (17.5%) | 40 | 2.72 (1.43-5.15) | 0.002 | MICE framework; database fixed effect omitted |
| AKI-by-database interaction | Pooled | Interaction OR | 712 | 381 |  |  | 1.71 (0.69-4.22) | 0.244 | MIMIC-IV vs eICU multiplicative interaction |
| **C. Key robustness analyses** | | | | | | | | | |
| 48 h landmark non-LOS composite | Pooled | Post-48 h death/ventilation/vasopressor | 101 | 4 | 22 (21.8%) | 2 | 1.63 (0.08-34.87) | 0.750 | Exploratory; sparse events |
| Excluding timed RRT <=6 h | Pooled | OR for serum creatinine AKI | 707 | 379 | 121 (17.1%) | 91 | 3.27 (2.07-5.16) | <0.001 | Early-treatment robustness check |
| **D. AKI definition sensitivity** | | | | | | | | | |
| Serum creatinine AKI | Pooled | Serum creatinine AKI | 712 | 381 | 121 (17.0%) | 91 | 3.36 (2.14-5.29) | <0.001 | MICE framework; same outcome and core adjustment |
| Serum creatinine AKI | MIMIC-IV | Serum creatinine AKI | 387 | 208 | 64 (16.5%) | 51 | 4.45 (2.28-8.68) | <0.001 | MICE framework; same outcome and core adjustment |
| Serum creatinine AKI | eICU | Serum creatinine AKI | 325 | 173 | 57 (17.5%) | 40 | 2.72 (1.43-5.15) | 0.002 | MICE framework; same outcome and core adjustment |
| Creatinine-or-RRT AKI | Pooled | Creatinine-or-RRT AKI | 712 | 381 | 130 (18.3%) | 97 | 3.43 (2.19-5.38) | <0.001 | MICE framework; same outcome and core adjustment |
| Creatinine-or-RRT AKI | MIMIC-IV | Creatinine-or-RRT AKI | 387 | 208 | 71 (18.3%) | 56 | 4.68 (2.43-9.05) | <0.001 | MICE framework; same outcome and core adjustment |
| Creatinine-or-RRT AKI | eICU | Creatinine-or-RRT AKI | 325 | 173 | 59 (18.2%) | 41 | 2.64 (1.40-4.99) | 0.003 | MICE framework; same outcome and core adjustment |
| Full KDIGO AKI | Pooled | Full KDIGO AKI | 712 | 381 | 304 (42.7%) | 195 | 2.22 (1.63-3.04) | <0.001 | MICE framework; same outcome and core adjustment |
| Full KDIGO AKI | MIMIC-IV | Full KDIGO AKI | 387 | 208 | 170 (43.9%) | 111 | 2.35 (1.54-3.60) | <0.001 | MICE framework; same outcome and core adjustment |
| Full KDIGO AKI | eICU | Full KDIGO AKI | 325 | 173 | 134 (41.2%) | 84 | 2.06 (1.28-3.29) | 0.003 | MICE framework; same outcome and core adjustment |
| Urine-output AKI | Pooled | Urine-output AKI | 712 | 381 | 230 (32.3%) | 145 | 1.84 (1.33-2.56) | <0.001 | MICE framework; same outcome and core adjustment |
| Urine-output AKI | MIMIC-IV | Urine-output AKI | 387 | 208 | 140 (36.2%) | 92 | 2.16 (1.39-3.35) | <0.001 | MICE framework; same outcome and core adjustment |
| Urine-output AKI | eICU | Urine-output AKI | 325 | 173 | 90 (27.7%) | 53 | 1.41 (0.84-2.35) | 0.193 | MICE framework; same outcome and core adjustment |
| Full KDIGO stage >=2 | Pooled | Full KDIGO stage >=2 | 712 | 381 | 195 (27.4%) | 129 | 2.20 (1.54-3.14) | <0.001 | MICE framework; same outcome and core adjustment |
| Full KDIGO stage >=2 | MIMIC-IV | Full KDIGO stage >=2 | 387 | 208 | 99 (25.6%) | 67 | 2.28 (1.39-3.75) | 0.001 | MICE framework; same outcome and core adjustment |
| Full KDIGO stage >=2 | eICU | Full KDIGO stage >=2 | 325 | 173 | 96 (29.5%) | 62 | 2.12 (1.26-3.57) | 0.005 | MICE framework; same outcome and core adjustment |
| Full KDIGO stage 3 | Pooled | Full KDIGO stage 3 | 712 | 381 | 77 (10.8%) | 49 | 1.80 (1.07-3.02) | 0.026 | MICE framework; exploratory stage-specific definition |
| Full KDIGO stage 3 | MIMIC-IV | Full KDIGO stage 3 | 387 | 208 | 30 (7.8%) | 25 | 6.01 (2.06-17.53) | 0.001 | MICE framework; exploratory stage-specific definition |
| Full KDIGO stage 3 | eICU | Full KDIGO stage 3 | 325 | 173 | 47 (14.5%) | 24 | 0.96 (0.50-1.84) | 0.890 | MICE framework; exploratory stage-specific definition |
| Timed RRT AKI | Pooled | Timed RRT AKI | 712 | 381 | 12 (1.7%) | 9 | 3.20 (0.73-14.06) | 0.123 | MICE framework; exploratory sparse-exposure definition |
| Timed RRT AKI | MIMIC-IV | Timed RRT AKI | 387 | 208 | 9 (2.3%) | 7 | 3.20 (0.56-18.22) | 0.190 | MICE framework; exploratory sparse-exposure definition |
| Timed RRT AKI | eICU | Timed RRT AKI | 325 | 173 | 3 (0.9%) | 2 | 2.12 (0.10-47.15) | 0.634 | MICE framework; exploratory sparse-exposure definition |

Note. This supplementary table reports the complete model and sensitivity-analysis results supporting Table 2 and the forest plot. Unless stated otherwise, models estimate the association between AKI and the composite adverse maternal outcome excluding RRT, with adjustment for age, race, baseline creatinine, chronic hypertension, diabetes, and database fixed effect for pooled analyses. Database-stratified models omit the database fixed effect. Exposure and outcome were not imputed. MICE denotes the prespecified analysis framework; after restriction to the final 712-patient primary analysis cohort, all prespecified model variables were complete after cleaning. The complete-case primary model therefore retained the same 712 patients. For interaction rows, N and Events refer to the fitted interaction model and exposed counts are not applicable. The 48 h landmark analysis is exploratory because post-landmark events were sparse. The serum creatinine AKI row is the primary definition and is repeated in the definition-sensitivity section for direct comparison.
