# Supplementary material
Source: Research Square preprint supplement (doi:10.21203/rs.3.rs-10300113/v1)
Supplement: Supplementary file 5 [file d884313a33dca24d4bfab616.docx]

**Supplementary Table 5. MIMIC maternal-record fetal and delivery outcome proxies**

| **Proxy outcome** | **N** | **No Scr-AKI, n (%)** | **Scr-AKI, n (%)** | **Risk difference** | **Fisher OR (95% CI)** | **P value** |
| --- | --- | --- | --- | --- | --- | --- |
| Any delivery outcome code (V27/Z37) | 387 | 148 (45.8%) | 39 (60.9%) | 15.1 pp | 1.84 (1.03-3.33) | 0.029 |
| Any livebirth delivery outcome code | 387 | 142 (44.0%) | 39 (60.9%) | 17.0 pp | 1.98 (1.11-3.60) | 0.014 |
| Any stillbirth delivery outcome code | 387 | 6 (1.9%) | 0 (0.0%) | -1.9 pp | NE | 0.595 |
| Maternal IUFD/fetal death code | 387 | 5 (1.5%) | 1 (1.6%) | 0.0 pp | NE | 1.000 |
| Any stillbirth or IUFD proxy | 387 | 6 (1.9%) | 1 (1.6%) | -0.3 pp | NE | 1.000 |
| Preterm labor/delivery proxy | 387 | 28 (8.7%) | 5 (7.8%) | -0.9 pp | 0.89 (0.26-2.48) | 1.000 |
| Fetal distress proxy | 387 | 1 (0.3%) | 1 (1.6%) | 1.3 pp | NE | 0.304 |
| Fetal growth restriction proxy | 387 | 7 (2.2%) | 0 (0.0%) | -2.2 pp | NE | 0.606 |
| Multiple-birth delivery code | 387 | 12 (3.7%) | 7 (10.9%) | 7.2 pp | 3.17 (1.01-9.18) | 0.024 |

Note. Analyses are exploratory and limited to MIMIC maternal-record delivery/fetal diagnostic proxies. These variables reflect record availability and code presence rather than adjudicated infant outcomes; they are not true infant-level linked outcomes and should not be interpreted as neonatal outcome analyses or causal effects. No multiplicity adjustment was applied. eICU did not provide a reliable mother-infant linkage or comparable infant outcome source. NE indicates that the Fisher OR was not emphasized because one or more event cells contained fewer than 5 events.
